# Supplementary figures and images for: Electroacupuncture Pretreatment Attenuates Acute Lung Injury Through α7 Nicotinic Acetylcholine Receptor-Mediated Inhibition of HMGB1 Release in Rats After Cardiopulmonary Bypass
Source: PubMed Central journal article supplement — Shock. 2018 Aug 13;50(3):351–9. doi: 10.1097/SHK.0000000000001050 (PMC6072368; doi:10.1097/shk.0000000000001050), 2018-08-13

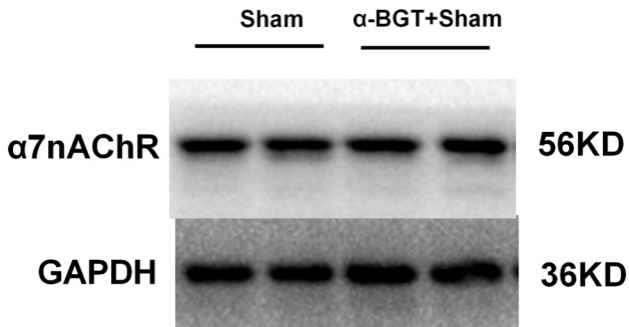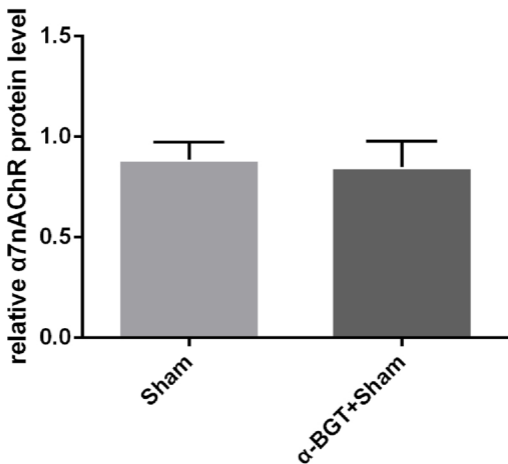

Supplement: shk-50-351-s001.pdf [file shk-50-351-s001.pdf]
